# Supplementary material for: Partitioning Entropy with Action Mechanics: Predicting Chemical Reaction Rates and Gaseous Equilibria of Reactions of Hydrogen from Molecular Properties
Source: MDPI journal article supplement (doi:10.3390/e23081056), 2021-08-16
Supplement: s1 [file s1]

```

ENTROPY6/CAL Sep 17, 2014
Uses action @ to calculate entropy S
For diatomics and linear triatomics,
input mass of terminal atoms in L & N
and central atom or monatomic in M
For other polyatomics, input
Ia, Ib, and Ic as principal moments
of inertia instead.
Input electronic multiplicity as @
Get vibrational entropy using eqn
 $S_v = R \ln(e^x - 1) - R \ln(1 - e^{-x})$ ;  $x = hv/kT$ 
Get vibrational kinetic heat using
 $C_{vv} = R x^2 / 2 (\cosh x - 1)$  ex Moore
Input rotational symmetry Z in r99
0560 096 LABEL
0561 090 Z
0562 107 STO MEM
0563 057 9
0564 057 9
0565 119 print
0566 002 HALT
0567 048 0
Input electron multiplicity @e in r89
0608 096 LABEL
0609 081 @
0610 107 STO MEM
0611 056 8
0612 057 9
0613 119 print
0614 002 HALT
0615 048 0
Input gas pressure P (atm) in r01
0656 096 LABEL
0657 080 P
0658 107 STO MEM
0659 048 0
0660 049 1
0661 119 print
0662 002 HALT
0663 048 0
Input diatomic mass1 L in r02
0704 096 LABEL
0705 076 L
0706 107 STO MEM
0707 048 0
0708 050 2
0709 119 print
0710 002 HALT
0711 048 0
0712 096 LABEL
0713 077 M
Input monatomic mass M in r03
0754 107 STO MEM
0755 048 0
0756 051 3
0757 119 print
0758 002 HALT
0759 048 0
Input diatomic mass 2 N in r04
0800 096 LABEL
0801 078 N
0802 107 STO MEM
0803 048 0
0804 052 4
0805 119 print
0806 002 HALT
0807 048 0
Input atomic mass3 O in r05
0848 096 LABEL
0849 079 O
0850 107 STO MEM
0851 048 0
0852 053 5
0853 119 print
0854 002 HALT
0855 048 0
Input atomic mass4 J in r06
0896 096 LABEL
0897 074 J
0898 107 STO MEM
0899 048 0
0900 054 6
0901 119 print
0902 002 HALT
0903 048 0
Input atomic mass5 Y in r07
0944 096 LABEL
0945 089 Y
0946 107 STO MEM
0947 048 0
0948 055 7
0949 119 print
0950 002 HALT
0951 048 0
0952 119 print
0953 002 HALT
0954 048 0
Input bond length r1=R in r09
0995 096 LABEL
0996 082 R
0997 107 STO MEM
0998 048 0
0999 057 9
1000 119 print
1001 002 HALT
1002 048 0
Input bond length r2=S in r10
1043 096 LABEL
1044 083 S
1045 107 STO MEM
1046 049 1
1047 048 0
1048 119 print
1049 002 HALT
1050 048 0
Input bond length r3=T in r11
1091 096 LABEL
1092 084 T

```

|       |                                |         |                                 |
|-------|--------------------------------|---------|---------------------------------|
| 1093  | 107                            | STO MEM | Input frequency 4, I            |
| 1094  | 049                            | 1       | 1427 096 LABEL                  |
| 1095  | 049                            | 1       | 1428 073 I                      |
| 1096  | 119                            | print   | 1429 107 STO MEM                |
| 1097  | 002                            | HALT    | 1430 051 3                      |
| 1098  | 048                            | 0       | 1431 052 4                      |
| Input | IrA rot. moment inertia in r12 |         | 1432 119 print                  |
| 1139  | 096                            | LABEL   | 1433 002 HALT                   |
| 1140  | 065                            | A       | 1434 048 0                      |
| 1141  | 107                            | STO MEM | Input degeneracy F, D           |
| 1142  | 049                            | 1       | 1475 096 LABEL                  |
| 1143  | 050                            | 2       | 1476 068 D                      |
| 1144  | 119                            | print   | 1477 107 STO MEM                |
| 1145  | 002                            | HALT    | 1478 051 3                      |
| 1146  | 048                            | 0       | 1479 053 5                      |
| Input | IrB rot. moment inertia in r13 |         | 1480 119 print                  |
| 1187  | 096                            | LABEL   | 1481 002 HALT                   |
| 1188  | 066                            | B       | 1482 048 0                      |
| 1189  | 107                            | STO MEM | Input degeneracy G, E           |
| 1190  | 049                            | 1       | 1523 096 LABEL                  |
| 1191  | 051                            | 3       | 1524 069 E                      |
| 1192  | 119                            | print   | 1525 107 STO MEM                |
| 1193  | 002                            | HALT    | 1526 051 3                      |
| 1194  | 048                            | 0       | 1527 054 6                      |
| Input | IrC rot. moment inertia in r14 |         | 1528 119 print                  |
| 1235  | 096                            | LABEL   | 1529 002 HALT                   |
| 1236  | 067                            | C       | 1530 048 0                      |
| 1237  | 107                            | STO MEM | Input degeneracy W, for H and I |
| 1238  | 049                            | 1       | 1571 096 LABEL                  |
| 1239  | 052                            | 4       | 1572 087 W                      |
| 1240  | 119                            | print   | 1573 107 STO MEM                |
| 1241  | 002                            | HALT    | 1574 051 3                      |
| 1242  | 109                            | RCL MEM | 1575 055 7                      |
| Input | frequency 1 $w=c/v$ , F        |         | 1576 119 print                  |
| 1283  | 096                            | LABEL   | 1577 002 HALT                   |
| 1284  | 070                            | F       | 1578 048 0                      |
| 1285  | 107                            | STO MEM | Input degrees Kelvin K in r08   |
| 1286  | 051                            | 3       | 1619 096 LABEL                  |
| 1287  | 049                            | 1       | 1620 075 K                      |
| 1288  | 119                            | print   | 1621 107 STO MEM                |
| 1289  | 002                            | HALT    | 1622 048 0                      |
| 1290  | 048                            | 0       | 1623 056 8                      |
| Input | frequency 2, G                 |         | 1624 119 print                  |
| 1331  | 096                            | LABEL   | 1625 002 HALT                   |
| 1332  | 071                            | G       | Execute by ShiftX               |
| 1333  | 107                            | STO MEM | 1666 096 LABEL                  |
| 1334  | 051                            | 3       | 1667 088 X                      |
| 1335  | 050                            | 2       | Store H atomic mass in g in r95 |
| 1336  | 119                            | print   | 1708 049 1                      |
| 1337  | 002                            | HALT    | 1709 046 .                      |
| 1338  | 048                            | 0       | 1710 054 6                      |
| Input | frequency 3, H                 |         | 1711 055 7                      |
| 1379  | 096                            | LABEL   | 1712 051 3                      |
| 1380  | 072                            | H       | 1713 053 5                      |
| 1381  | 107                            | STO MEM | 1714 050 2                      |
| 1382  | 051                            | 3       | 1715 053 5                      |
| 1383  | 051                            | 3       | 1716 101 EE                     |
| 1384  | 119                            | print   | 1717 050 2                      |
| 1385  | 002                            | HALT    | 1718 052 4                      |
| 1386  | 048                            | 0       | 1719 111 +/-                    |

|                                       |     |         |                                       |     |         |
|---------------------------------------|-----|---------|---------------------------------------|-----|---------|
| 1720                                  | 107 | STO MEM | 1897                                  | 053 | 5       |
| 1721                                  | 057 | 9       | 1898                                  | 056 | 8       |
| 1722                                  | 053 | 5       | 1899                                  | 101 | EE      |
| Store gas constant R in r96           |     |         | 1900                                  | 049 | 1       |
| 1763                                  | 056 | 8       | 1901                                  | 048 | 0       |
| 1764                                  | 046 | .       | 1902                                  | 119 | print   |
| 1765                                  | 051 | 3       | Store c in r94                        |     |         |
| 1766                                  | 049 | 1       | 1943                                  | 107 | STO MEM |
| 1767                                  | 052 | 4       | 1944                                  | 057 | 9       |
| 1768                                  | 052 | 4       | 1945                                  | 052 | 4       |
| 1769                                  | 054 | 6       | 1946                                  | 040 | (       |
| 1770                                  | 050 | 2       | 1947                                  | 040 | (       |
| 1771                                  | 049 | 1       | Recall pressure (atm), find radius rt |     |         |
| 1772                                  | 055 | 7       | Recall T/P/298.15                     |     |         |
| 1773                                  | 053 | 5       | 2028                                  | 109 | RCL MEM |
| 1774                                  | 107 | STO MEM | 2029                                  | 048 | 0       |
| 1775                                  | 057 | 9       | 2030                                  | 056 | 8       |
| 1776                                  | 054 | 6       | 2031                                  | 047 | /       |
| Store Boltzmann's constant k in r97   |     |         | 2032                                  | 109 | RCL MEM |
| 1817                                  | 049 | 1       | 2033                                  | 048 | 0       |
| 1818                                  | 046 | .       | 2034                                  | 049 | 1       |
| 1819                                  | 051 | 3       | 2035                                  | 047 | /       |
| 1820                                  | 056 | 8       | 2036                                  | 050 | 2       |
| 1821                                  | 048 | 0       | 2037                                  | 057 | 9       |
| 1822                                  | 054 | 6       | 2038                                  | 056 | 8       |
| 1823                                  | 052 | 4       | 2039                                  | 046 | .       |
| 1824                                  | 056 | 8       | 2040                                  | 049 | 1       |
| 1825                                  | 056 | 8       | 2041                                  | 053 | 5       |
| 1826                                  | 101 | EE      | 2042                                  | 061 | =       |
| 1827                                  | 049 | 1       | 2043                                  | 119 | print   |
| 1828                                  | 054 | 6       | 2044                                  | 092 | Root    |
| 1829                                  | 111 | +/-     | 2045                                  | 051 | 3       |
| 1830                                  | 107 | STO MEM | 2046                                  | 042 | x       |
| 1831                                  | 057 | 9       | 2047                                  | 049 | 1       |
| 1832                                  | 055 | 7       | 2048                                  | 046 | .       |
| Store Planck's red. quantum h- in r98 |     |         | 2049                                  | 055 | 7       |
| 1873                                  | 049 | 1       | 2050                                  | 049 | 1       |
| 1874                                  | 046 | .       | 2051                                  | 056 | 8       |
| 1875                                  | 048 | 0       | 2052                                  | 056 | 8       |
| 1876                                  | 053 | 5       | 2053                                  | 041 | )       |
| 1877                                  | 052 | 4       | 2054                                  | 042 | x       |
| 1878                                  | 057 | 9       | 2055                                  | 049 | 1       |
| 1879                                  | 049 | 1       | 2056                                  | 101 | EE      |
| 1880                                  | 056 | 8       | 2057                                  | 055 | 7       |
| 1881                                  | 053 | 5       | 2058                                  | 111 | +/-     |
| 1882                                  | 101 | EE      | 2059                                  | 061 | =       |
| 1883                                  | 050 | 2       | 2060                                  | 119 | print   |
| 1884                                  | 055 | 7       | 2061                                  | 113 | Square  |
| 1885                                  | 111 | +/-     | 2062                                  | 041 | )       |
| 1886                                  | 107 | STO MEM | 2063                                  | 042 | x       |
| 1887                                  | 057 | 9       | 2064                                  | 040 | (       |
| 1888                                  | 056 | 8       | Recall AW 1 from r02                  |     |         |
| 1889                                  | 050 | 2       | 2105                                  | 109 | RCL MEM |
| 1890                                  | 046 | .       | 2106                                  | 048 | 0       |
| 1891                                  | 057 | 9       | 2107                                  | 050 | 2       |
| 1892                                  | 057 | 9       | 2108                                  | 043 | +       |
| 1893                                  | 055 | 7       | Recall AW 2 from r03                  |     |         |
| 1894                                  | 057 | 9       | 2149                                  | 109 | RCL MEM |
| 1895                                  | 050 | 2       | 2150                                  | 048 | 0       |
| 1896                                  | 052 | 4       | 2151                                  | 051 | 3       |

|                                  |     |         |                       |     |         |
|----------------------------------|-----|---------|-----------------------|-----|---------|
| 2152                             | 043 | +       | 2563                  | 119 | print   |
| Recall AW 3 from r04             |     |         | 2564                  | 109 | RCL MEM |
| 2193                             | 109 | RCL MEM | 2565                  | 049 | 1       |
| 2194                             | 048 | 0       | 2566                  | 055 | 7       |
| 2195                             | 052 | 4       | 2567                  | 121 | Cube    |
| 2196                             | 043 | +       | 2568                  | 061 | =       |
| Recall AW 4 from r05             |     |         | 2569                  | 047 | /       |
| 2237                             | 109 | RCL MEM | 2570                  | 049 | 1       |
| 2238                             | 048 | 0       | 2571                  | 048 | 0       |
| 2239                             | 053 | 5       | 2572                  | 046 | .       |
| 2240                             | 043 | +       | 2573                  | 050 | 2       |
| Recall AW 5 from r06             |     |         | 2574                  | 050 | 2       |
| 2281                             | 109 | RCL MEM | 2575                  | 057 | 9       |
| 2282                             | 048 | 0       | 2576                  | 055 | 7       |
| 2283                             | 054 | 6       | 2577                  | 061 | =       |
| Recall AW 6 from r07             |     |         | 2578                  | 110 | LOG e   |
| 2324                             | 109 | RCL MEM | 2579                  | 042 | x       |
| 2325                             | 048 | 0       | 2580                  | 109 | RCL MEM |
| 2326                             | 055 | 7       | 2581                  | 057 | 9       |
| 2327                             | 041 | )       | 2582                  | 054 | 6       |
| 2328                             | 042 | x       | 2583                  | 061 | =       |
| 2329                             | 109 | RCL MEM | 2584                  | 107 | STO MEM |
| 2330                             | 057 | 9       | 2585                  | 049 | 1       |
| 2331                             | 053 | 5       | 2586                  | 056 | 8       |
| 2332                             | 061 | =       | 2587                  | 109 | RCL MEM |
| Print and store It in r15        |     |         | 2588                  | 049 | 1       |
| 2373                             | 119 | print   | 2589                  | 056 | 8       |
| 2374                             | 107 | STO MEM | 2590                  | 119 | print   |
| 2375                             | 049 | 1       | 2591                  | 107 | STO MEM |
| 2376                             | 053 | 5       | 2592                  | 054 | 6       |
| 2377                             | 042 | x       | 2593                  | 049 | 1       |
| Recall k                         |     |         | 2594                  | 109 | RCL MEM |
| 2418                             | 109 | RCL MEM | 2595                  | 054 | 6       |
| 2419                             | 057 | 9       | 2596                  | 049 | 1       |
| 2420                             | 055 | 7       | Print cumulative -G/T |     |         |
| 2421                             | 042 | x       | 2637                  | 119 | print   |
| 2422                             | 051 | 3       | 2638                  | 109 | RCL MEM |
| 2423                             | 042 | x       | 2639                  | 057 | 9       |
| 2424                             | 109 | RCL MEM | 2640                  | 054 | 6       |
| 2425                             | 048 | 0       | 2641                  | 042 | x       |
| 2426                             | 056 | 8       | 2642                  | 050 | 2       |
| 2427                             | 061 | =       | 2643                  | 046 | .       |
| 2428                             | 092 | Root    | 2644                  | 053 | 5       |
| 2429                             | 050 | 2       | 2645                  | 061 | =       |
| 2430                             | 061 | =       | 2646                  | 117 | SUM MEM |
| Print and store action @t in r16 |     |         | 2647                  | 049 | 1       |
| 2471                             | 119 | print   | 2648                  | 056 | 8       |
| 2472                             | 107 | STO MEM | 2649                  | 107 | STO MEM |
| 2473                             | 049 | 1       | 2650                  | 054 | 6       |
| 2474                             | 054 | 6       | 2651                  | 050 | 2       |
| 2475                             | 047 | /       | 2652                  | 109 | RCL MEM |
| Recall h-                        |     |         | 2653                  | 054 | 6       |
| 2516                             | 109 | RCL MEM | 2654                  | 050 | 2       |
| 2517                             | 057 | 9       | Print cmulative H/T   |     |         |
| 2518                             | 056 | 8       | 2695                  | 119 | print   |
| 2519                             | 061 | =       | 2696                  | 109 | RCL MEM |
| Print and store @/h- in r17      |     |         | 2697                  | 049 | 1       |
| 2560                             | 107 | STO MEM | 2698                  | 056 | 8       |
| 2561                             | 049 | 1       | 2699                  | 119 | print   |
| 2562                             | 055 | 7       | Print St with Qe=1    |     |         |

|                              |                           |     |         |
|------------------------------|---------------------------|-----|---------|
| Check for Qe eg 02 3, N20 4  | 3112                      | 048 | 0       |
| 2780 040 (                   | 3113                      | 050 | 2       |
| 2781 049 1                   | 3114                      | 042 | x       |
| 2782 045 -                   | 3115                      | 109 | RCL MEM |
| 2783 109 RCL MEM             | 3116                      | 048 | 0       |
| 2784 056 8                   | 3117                      | 052 | 4       |
| 2785 057 9                   | 3118                      | 041 | )       |
| 2786 041 )                   | 3119                      | 047 | /       |
| 2787 038 If zero             | 3120                      | 040 | (       |
| 2788 104 Hyperbol            | 3121                      | 109 | RCL MEM |
| 2789 109 RCL MEM             | 3122                      | 048 | 0       |
| 2790 056 8                   | 3123                      | 050 | 2       |
| 2791 057 9                   | 3124                      | 043 | +       |
| 2792 110 LOG e               | 3125                      | 109 | RCL MEM |
| 2793 042 x                   | 3126                      | 048 | 0       |
| 2794 109 RCL MEM             | 3127                      | 052 | 4       |
| 2795 057 9                   | 3128                      | 041 | )       |
| 2796 054 6                   | 3129                      | 042 | x       |
| 2797 061 =                   | Recall H atom mass        |     |         |
| 2798 117 SUM MEM             | 3170                      | 109 | RCL MEM |
| 2799 054 6                   | 3171                      | 057 | 9       |
| 2800 049 1                   | 3172                      | 053 | 5       |
| 2801 117 SUM MEM             | 3173                      | 042 | x       |
| 2802 049 1                   | 3174                      | 040 | (       |
| 2803 056 8                   | 3175                      | 109 | RCL MEM |
| 2804 109 RCL MEM             | 3176                      | 048 | 0       |
| 2805 049 1                   | 3177                      | 057 | 9       |
| 2806 056 8                   | 3178                      | 043 | +       |
| Print St with Qe>1           | 3179                      | 109 | RCL MEM |
| 2847 119 print               | 3180                      | 049 | 1       |
| 2848 109 RCL MEM             | 3181                      | 048 | 0       |
| 2849 054 6                   | 3182                      | 041 | )       |
| 2850 049 1                   | 3183                      | 113 | Square  |
| Print cumulative -G/T        | 3184                      | 041 | )       |
| 2891 119 print               | Print and store Ir in r19 |     |         |
| 2892 096 LABEL               | 3225                      | 119 | print   |
| 2893 104 Hyperbol            | 3226                      | 107 | STO MEM |
| Test if monotomic            | 3227                      | 049 | 1       |
| 2934 109 RCL MEM             | 3228                      | 057 | 9       |
| 2935 048 0                   | 3229                      | 040 | (       |
| 2936 052 4                   | 3230                      | 109 | RCL MEM |
| 2937 038 If zero             | 3231                      | 049 | 1       |
| 2938 115 Sine                | 3232                      | 057 | 9       |
| Calculate rotational entropy | 3233                      | 042 | x       |
| Test if non-linear           | Recall degrees K          |     |         |
| 3019 040 (                   | 3274                      | 109 | RCL MEM |
| 3020 048 0                   | 3275                      | 048 | 0       |
| 3021 045 -                   | 3276                      | 056 | 8       |
| Recall Ia                    | 3277                      | 042 | x       |
| 3062 109 RCL MEM             | Recall k                  |     |         |
| 3063 049 1                   | 3318                      | 109 | RCL MEM |
| 3064 050 2                   | 3319                      | 057 | 9       |
| 3065 041 )                   | 3320                      | 055 | 7       |
| 3066 064 Inverse             | 3321                      | 042 | x       |
| 3067 037 If pos              | 3322                      | 050 | 2       |
| 3068 116 Tangent             | 3323                      | 041 | )       |
| 3069 040 (                   | 3324                      | 061 | =       |
| Calculate reduced mass       | 3325                      | 092 | Root    |
| 3110 040 (                   | 3326                      | 050 | 2       |
| 3111 109 RCL MEM             | 3327                      | 061 | =       |

```

Print and store @r in r20
3368 119 print
3369 107 STO MEM
3370 050 2
3371 048 0
Calculate Sr
3412 040 (
3413 109 RCL MEM
3414 050 2
3415 048 0
3416 047 /
Recall h-
3457 109 RCL MEM
3458 057 9
3459 056 8
3460 041 )
Print and store @/h- in r21
3501 119 print
3502 107 STO MEM
3503 050 2
3504 049 1
3505 113 Square
3506 047 /
Insert symmetry factor
3547 109 RCL MEM
3548 057 9
3549 057 9
3550 061 =
3551 110 LOG e
3552 042 x
Recall R
3593 109 RCL MEM
3594 057 9
3595 054 6
3596 061 =
Print and store -G/T in r22
3637 119 print
3638 107 STO MEM
3639 050 2
3640 050 2
3641 117 SUM MEM
3642 054 6
3643 049 1
3644 109 RCL MEM
3645 054 6
3646 049 1
3647 119 print
3648 109 RCL MEM
3649 057 9
3650 054 6
3651 117 SUM MEM
3652 054 6
3653 050 2
3654 117 SUM MEM
3655 050 2
3656 050 2
3657 109 RCL MEM
3658 054 6
3659 050 2
Print cumulative C

```

```

3700 119 print
3701 109 RCL MEM
3702 050 2
3703 050 2
3704 119 print
3705 043 +
3706 109 RCL MEM
3707 049 1
3708 056 8
3709 061 =
Print St+Sr
3750 119 print
3751 034 Set flag
3752 049 1
3753 034 Set flag
3754 053 5
3755 040 (
3756 048 0
3757 045 -
3758 109 RCL MEM
3759 051 3
3760 049 1
3761 041 )
3762 064 Inverse
3763 037 If pos
3764 086 V
3765 109 RCL MEM
3766 050 2
3767 050 2
3768 042 x
3769 109 RCL MEM
3770 048 0
3771 056 8
3772 061 =
Print cumulative ST
3813 119 print
3814 109 RCL MEM
3815 054 6
3816 049 1
3817 042 x
3818 109 RCL MEM
3819 048 0
3820 056 8
3821 061 =
Print cumulative -G
3862 119 print
3863 109 RCL MEM
3864 054 6
3865 050 2
3866 042 x
3867 109 RCL MEM
3868 048 0
3869 056 8
3870 061 =
Print cumulative H
3911 119 print
3912 002 HALT
Calculate Sr for polyatomic gases
Sr=Rln[pi^1/2e^3/2@a@b@c/h-^3/z)
Calculate @rA

```

|                               |     |         |                               |
|-------------------------------|-----|---------|-------------------------------|
| 4033                          | 096 | LABEL   | Print and store @rB in r25    |
| 4034                          | 116 | Tangent | 4367 119 print                |
| 4035                          | 040 | (       | 4368 107 STO MEM              |
| 4036                          | 109 | RCL MEM | 4369 050 2                    |
| 4037                          | 049 | 1       | 4370 053 5                    |
| 4038                          | 050 | 2       | 4371 109 RCL MEM              |
| 4039                          | 042 | x       | 4372 050 2                    |
| 4040                          | 109 | RCL MEM | 4373 053 5                    |
| 4041                          | 048 | 0       | 4374 047 /                    |
| 4042                          | 056 | 8       | Recall h-                     |
| 4043                          | 042 | x       | 4415 109 RCL MEM              |
| 4044                          | 050 | 2       | 4416 057 9                    |
| 4045                          | 042 | x       | 4417 056 8                    |
| Recall k                      |     |         | 4418 061 =                    |
| 4086                          | 109 | RCL MEM | Print and store @rB/h- in r26 |
| 4087                          | 057 | 9       | 4459 119 print                |
| 4088                          | 055 | 7       | 4460 107 STO MEM              |
| 4089                          | 041 | )       | 4461 050 2                    |
| 4090                          | 092 | Root    | 4462 054 6                    |
| 4091                          | 050 | 2       | Calculate @rC                 |
| 4092                          | 061 | =       | 4503 040 (                    |
| Print and store @rA in r23    |     |         | 4504 109 RCL MEM              |
| 4133                          | 119 | print   | 4505 049 1                    |
| 4134                          | 107 | STO MEM | 4506 052 4                    |
| 4135                          | 050 | 2       | 4507 042 x                    |
| 4136                          | 051 | 3       | 4508 109 RCL MEM              |
| 4137                          | 109 | RCL MEM | 4509 048 0                    |
| 4138                          | 050 | 2       | 4510 056 8                    |
| 4139                          | 051 | 3       | 4511 042 x                    |
| 4140                          | 047 | /       | 4512 050 2                    |
| Recall h-                     |     |         | 4513 042 x                    |
| 4181                          | 109 | RCL MEM | Recall k                      |
| 4182                          | 057 | 9       | 4554 109 RCL MEM              |
| 4183                          | 056 | 8       | 4555 057 9                    |
| 4184                          | 061 | =       | 4556 055 7                    |
| Print and store @rA/h- in r24 |     |         | 4557 041 )                    |
| 4225                          | 119 | print   | 4558 092 Root                 |
| 4226                          | 107 | STO MEM | 4559 050 2                    |
| 4227                          | 050 | 2       | 4560 061 =                    |
| 4228                          | 052 | 4       | Print and store @rC in r27    |
| Calculate @rB                 |     |         | 4601 119 print                |
| 4269                          | 040 | (       | 4602 107 STO MEM              |
| 4270                          | 109 | RCL MEM | 4603 050 2                    |
| 4271                          | 049 | 1       | 4604 055 7                    |
| 4272                          | 051 | 3       | 4605 109 RCL MEM              |
| 4273                          | 042 | x       | 4606 050 2                    |
| 4274                          | 109 | RCL MEM | 4607 055 7                    |
| 4275                          | 048 | 0       | 4608 047 /                    |
| 4276                          | 056 | 8       | Recall h-                     |
| 4277                          | 042 | x       | 4649 109 RCL MEM              |
| 4278                          | 050 | 2       | 4650 057 9                    |
| 4279                          | 042 | x       | 4651 056 8                    |
| Recall k                      |     |         | 4652 061 =                    |
| 4320                          | 109 | RCL MEM | Print and store @rC/h- in r28 |
| 4321                          | 057 | 9       | 4693 119 print                |
| 4322                          | 055 | 7       | 4694 107 STO MEM              |
| 4323                          | 041 | )       | 4695 050 2                    |
| 4324                          | 092 | Root    | 4696 056 8                    |
| 4325                          | 050 | 2       | 4697 040 (                    |
| 4326                          | 061 | =       | 4698 109 RCL MEM              |

|                              |     |         |                                   |     |          |
|------------------------------|-----|---------|-----------------------------------|-----|----------|
| 4699                         | 050 | 2       | 4954                              | 109 | RCL MEM  |
| 4700                         | 052 | 4       | 4955                              | 054 | 6        |
| 4701                         | 042 | x       | 4956                              | 050 | 2        |
| 4702                         | 109 | RCL MEM | Print (Ht+Hr)/T                   |     |          |
| 4703                         | 050 | 2       | 4997                              | 119 | print    |
| 4704                         | 054 | 6       | 4998                              | 109 | RCL MEM  |
| 4705                         | 042 | x       | 4999                              | 050 | 2        |
| 4706                         | 109 | RCL MEM | 5000                              | 057 | 9        |
| 4707                         | 050 | 2       | Print Sr non-linear molecules     |     |          |
| 4708                         | 056 | 8       | 5041                              | 119 | print    |
| 4709                         | 041 | )       | 5042                              | 043 | +        |
| Print nrA x nrB x nrC        |     |         | 5043                              | 109 | RCL MEM  |
| 4750                         | 119 | print   | 5044                              | 049 | 1        |
| 4751                         | 047 | /       | 5045                              | 056 | 8        |
| Recall symmetry factor       |     |         | 5046                              | 061 | =        |
| 4792                         | 109 | RCL MEM | Print St+Sr                       |     |          |
| 4793                         | 057 | 9       | 5087                              | 119 | print    |
| 4794                         | 057 | 9       | 5088                              | 034 | Set flag |
| 4795                         | 042 | x       | 5089                              | 049 | 1        |
| 4796                         | 040 | (       | 5090                              | 096 | LABEL    |
| 4797                         | 112 | pi      | 5091                              | 086 | V        |
| 4798                         | 092 | Root    | 5092                              | 109 | RCL MEM  |
| 4799                         | 050 | 2       | 5093                              | 051 | 3        |
| 4800                         | 041 | )       | 5094                              | 049 | 1        |
| 4801                         | 061 | =       | Print wavelength cm <sup>-1</sup> |     |          |
| 4802                         | 110 | LOG e   | 5135                              | 119 | print    |
| 4803                         | 042 | x       | 5136                              | 042 | x        |
| Recall R                     |     |         | 5137                              | 109 | RCL MEM  |
| 4844                         | 109 | RCL MEM | 5138                              | 057 | 9        |
| 4845                         | 057 | 9       | 5139                              | 052 | 4        |
| 4846                         | 054 | 6       | 5140                              | 061 | =        |
| 4847                         | 061 | =       | Print true frequency v            |     |          |
| Print and store -Gr/T in r29 |     |         | 5181                              | 119 | print    |
| 4888                         | 119 | print   | 5182                              | 042 | x        |
| 4889                         | 107 | STO MEM | 5183                              | 050 | 2        |
| 4890                         | 050 | 2       | 5184                              | 042 | x        |
| 4891                         | 057 | 9       | 5185                              | 112 | pi       |
| 4892                         | 117 | SUM MEM | 5186                              | 042 | x        |
| 4893                         | 054 | 6       | 5187                              | 109 | RCL MEM  |
| 4894                         | 049 | 1       | 5188                              | 057 | 9        |
| 4895                         | 109 | RCL MEM | 5189                              | 056 | 8        |
| 4896                         | 054 | 6       | 5190                              | 061 | =        |
| 4897                         | 049 | 1       | 5191                              | 119 | print    |
| Print cumulative -G/T        |     |         | Store hv in r43                   |     |          |
| 4938                         | 119 | print   | 5232                              | 107 | STO MEM  |
| 4939                         | 040 | (       | 5233                              | 052 | 4        |
| 4940                         | 049 | 1       | 5234                              | 051 | 3        |
| 4941                         | 046 | .       | Recall temperature K              |     |          |
| 4942                         | 053 | 5       | 5275                              | 109 | RCL MEM  |
| 4943                         | 042 | x       | 5276                              | 048 | 0        |
| 4944                         | 109 | RCL MEM | 5277                              | 056 | 8        |
| 4945                         | 057 | 9       | 5278                              | 042 | x        |
| 4946                         | 054 | 6       | 5279                              | 109 | RCL MEM  |
| 4947                         | 041 | )       | 5280                              | 057 | 9        |
| 4948                         | 117 | SUM MEM | 5281                              | 055 | 7        |
| 4949                         | 050 | 2       | 5282                              | 061 | =        |
| 4950                         | 057 | 9       | Print kT                          |     |          |
| 4951                         | 117 | SUM MEM | 5323                              | 119 | print    |
| 4952                         | 054 | 6       | Store kT in r44                   |     |          |
| 4953                         | 050 | 2       | 5364                              | 107 | STO MEM  |



|                               |     |          |  |                                  |     |         |
|-------------------------------|-----|----------|--|----------------------------------|-----|---------|
| 5365                          | 052 | 4        |  | 5503                             | 109 | RCL MEM |
| 5366                          | 052 | 4        |  | 5504                             | 057 | 9       |
| 5367                          | 109 | RCL MEM  |  | 5505                             | 054 | 6       |
| 5368                          | 052 | 4        |  | 5506                             | 061 | =       |
| 5369                          | 051 | 3        |  | 5507                             | 107 | STO MEM |
| 5370                          | 047 | /        |  | 5508                             | 052 | 4       |
| 5371                          | 109 | RCL MEM  |  | 5509                             | 055 | 7       |
| 5372                          | 052 | 4        |  | 5510                             | 040 | (       |
| 5373                          | 052 | 4        |  | 5511                             | 109 | RCL MEM |
| 5374                          | 061 | =        |  | 5512                             | 052 | 4       |
| Store hv/kT = x in r45, print |     |          |  | 5513                             | 054 | 6       |
| 5415                          | 119 | print    |  | 5514                             | 045 | -       |
| 5416                          | 107 | STO MEM  |  | 5515                             | 109 | RCL MEM |
| 5417                          | 052 | 4        |  | 5516                             | 052 | 4       |
| 5418                          | 053 | 5        |  | 5517                             | 055 | 7       |
| Calculate Sv                  |     |          |  | 5518                             | 041 | )       |
| 5459                          | 040 | (        |  | 5519                             | 107 | STO MEM |
| 5460                          | 109 | RCL MEM  |  | 5520                             | 052 | 4       |
| 5461                          | 057 | 9        |  | 5521                             | 056 | 8       |
| 5462                          | 054 | 6        |  | Print Sv at w without degeneracy |     |         |
| 5463                          | 042 | x        |  | 5562                             | 119 | print   |
| 5464                          | 109 | RCL MEM  |  | 5563                             | 042 | x       |
| 5465                          | 052 | 4        |  | Recall degeneracy D              |     |         |
| 5466                          | 053 | 5        |  | 5604                             | 109 | RCL MEM |
| 5467                          | 047 | /        |  | 5605                             | 051 | 3       |
| 5468                          | 040 | (        |  | 5606                             | 053 | 5       |
| 5469                          | 040 | (        |  | 5607                             | 061 | =       |
| 5470                          | 049 | 1        |  | Print and store total Sv in r49  |     |         |
| 5471                          | 064 | Inverse  |  | 5648                             | 119 | print   |
| 5472                          | 110 | LOG e    |  | 5649                             | 117 | SUM MEM |
| 5473                          | 091 | Exponent |  | 5650                             | 052 | 4       |
| 5474                          | 109 | RCL MEM  |  | 5651                             | 057 | 9       |
| 5475                          | 052 | 4        |  | Sum cumulative -G/T              |     |         |
| 5476                          | 053 | 5        |  | 5692                             | 117 | SUM MEM |
| 5477                          | 041 | )        |  | 5693                             | 054 | 6       |
| 5478                          | 045 | -        |  | 5694                             | 049 | 1       |
| 5479                          | 049 | 1        |  | 5695                             | 109 | RCL MEM |
| 5480                          | 041 | )        |  | 5696                             | 054 | 6       |
| 5481                          | 061 | =        |  | 5697                             | 049 | 1       |
| 5482                          | 107 | STO MEM  |  | Print cumulative -G/T            |     |         |
| 5483                          | 052 | 4        |  | 5738                             | 119 | print   |
| 5484                          | 054 | 6        |  | 5739                             | 109 | RCL MEM |
| 5485                          | 040 | (        |  | 5740                             | 052 | 4       |
| 5486                          | 049 | 1        |  | 5741                             | 057 | 9       |
| 5487                          | 045 | -        |  | Print cumulative Sv              |     |         |
| 5488                          | 040 | (        |  | 5782                             | 119 | print   |
| 5489                          | 040 | (        |  | 5783                             | 047 | /       |
| 5490                          | 049 | 1        |  | 5784                             | 054 | 6       |
| 5491                          | 064 | Inverse  |  | 5785                             | 046 | .       |
| 5492                          | 110 | LOG e    |  | 5786                             | 048 | 0       |
| 5493                          | 041 | )        |  | 5787                             | 050 | 2       |
| 5494                          | 091 | Exponent |  | 5788                             | 050 | 2       |
| 5495                          | 109 | RCL MEM  |  | 5789                             | 049 | 1       |
| 5496                          | 052 | 4        |  | 5790                             | 052 | 4       |
| 5497                          | 053 | 5        |  | 5791                             | 049 | 1       |
| 5498                          | 111 | +/-      |  | 5792                             | 053 | 5       |
| 5499                          | 041 | )        |  | 5793                             | 101 | EE      |
| 5500                          | 041 | )        |  | 5794                             | 049 | 1       |
| 5501                          | 110 | LOG e    |  | 5795                             | 054 | 6       |
| 5502                          | 042 | x        |  | 5796                             | 061 | =       |

|                                    |     |          |       |                              |         |
|------------------------------------|-----|----------|-------|------------------------------|---------|
| 5797                               | 119 | print    | 6130  | 109                          | RCL MEM |
| ergs per molecule per degree       |     |          | 6131  | 053                          | 5       |
| 5838                               | 042 | x        | 6132  | 049                          | 1       |
| 5839                               | 109 | RCL MEM  | Print | SumCvv                       |         |
| 5840                               | 048 | 0        | 6173  | 119                          | print   |
| 5841                               | 056 | 8        | 6174  | 047                          | /       |
| 5842                               | 061 | =        | 6175  | 054                          | 6       |
| Print sT                           |     |          | 6176  | 046                          | .       |
| 5883                               | 119 | print    | 6177  | 048                          | 0       |
| 5884                               | 117 | SUM MEM  | 6178  | 050                          | 2       |
| 5885                               | 053 | 5        | 6179  | 050                          | 2       |
| 5886                               | 048 | 0        | 6180  | 049                          | 1       |
| 5887                               | 109 | RCL MEM  | 6181  | 052                          | 4       |
| 5888                               | 053 | 5        | 6182  | 049                          | 1       |
| 5889                               | 048 | 0        | 6183  | 053                          | 5       |
| Print svT                          |     |          | 6184  | 101                          | EE      |
| 5930                               | 119 | print    | 6185  | 049                          | 1       |
| Compute Cv at T with Moore formula |     |          | 6186  | 054                          | 6       |
| $Cv = R_x^2 / 2 (\cosh x - 1)$     |     |          | 6187  | 061                          | =       |
| 6011                               | 040 | (        | Print | ergs per molecule per degree |         |
| 6012                               | 040 | (        | 6228  | 119                          | print   |
| 6013                               | 109 | RCL MEM  | 6229  | 042                          | x       |
| 6014                               | 057 | 9        | 6230  | 109                          | RCL MEM |
| 6015                               | 054 | 6        | 6231  | 048                          | 0       |
| 6016                               | 042 | x        | 6232  | 056                          | 8       |
| 6017                               | 040 | (        | 6233  | 061                          | =       |
| 6018                               | 109 | RCL MEM  | Print | cvvT                         |         |
| 6019                               | 052 | 4        | 6274  | 119                          | print   |
| 6020                               | 053 | 5        | 6275  | 117                          | SUM MEM |
| 6021                               | 113 | Square   | 6276  | 053                          | 5       |
| 6022                               | 041 | )        | 6277  | 050                          | 2       |
| 6023                               | 041 | )        | 6278  | 109                          | RCL MEM |
| 6024                               | 047 | /        | 6279  | 053                          | 5       |
| 6025                               | 040 | (        | 6280  | 050                          | 2       |
| 6026                               | 050 | 2        | Print | SumcvvT                      |         |
| 6027                               | 042 | x        | 6321  | 119                          | print   |
| 6028                               | 040 | (        | 6322  | 035                          | If flag |
| 6029                               | 109 | RCL MEM  | 6323  | 053                          | 5       |
| 6030                               | 052 | 4        | 6324  | 125                          | ! !     |
| 6031                               | 053 | 5        | 6325  | 035                          | If flag |
| 6032                               | 104 | Hyperbol | 6326  | 052                          | 4       |
| 6033                               | 099 | Cosine   | 6327  | 123                          | !{      |
| 6034                               | 045 | -        | 6328  | 035                          | If flag |
| 6035                               | 049 | 1        | 6329  | 051                          | 3       |
| 6036                               | 041 | )        | 6330  | 033                          | !       |
| 6037                               | 041 | )        | 6331  | 035                          | If flag |
| 6038                               | 061 | =        | 6332  | 050                          | 2       |
| Print cumulative Cv                |     |          | 6333  | 099                          | Cosine  |
| 6079                               | 119 | print    | 6334  | 109                          | RCL MEM |
| 6080                               | 117 | SUM MEM  | 6335  | 051                          | 3       |
| 6081                               | 053 | 5        | 6336  | 050                          | 2       |
| 6082                               | 049 | 1        | 6337  | 107                          | STO MEM |
| 6083                               | 117 | SUM MEM  | 6338  | 051                          | 3       |
| 6084                               | 054 | 6        | 6339  | 049                          | 1       |
| 6085                               | 050 | 2        | 6340  | 109                          | RCL MEM |
| 6086                               | 109 | RCL MEM  | 6341  | 051                          | 3       |
| 6087                               | 054 | 6        | 6342  | 054                          | 6       |
| 6088                               | 050 | 2        | 6343  | 107                          | STO MEM |
| Print cumulative Cv                |     |          | 6344  | 051                          | 3       |
| 6129                               | 119 | print    | 6345  | 053                          | 5       |

|      |     |          |                   |     |         |
|------|-----|----------|-------------------|-----|---------|
| 6346 | 064 | Inverse  | 6406              | 041 | )       |
| 6347 | 034 | Set flag | Print Sv+Cv       |     |         |
| 6348 | 049 | 1        | 6447              | 119 | print   |
| 6349 | 034 | Set flag | 6448              | 107 | STO MEM |
| 6350 | 050 | 2        | 6449              | 053 | 5       |
| 6351 | 086 | V        | 6450              | 051 | 3       |
| 6352 | 096 | LABEL    | 6451              | 040 | (       |
| 6353 | 099 | Cosine   | 6452              | 109 | RCL MEM |
| 6354 | 109 | RCL MEM  | 6453              | 053 | 5       |
| 6355 | 051 | 3        | 6454              | 048 | 0       |
| 6356 | 051 | 3        | 6455              | 043 | +       |
| 6357 | 107 | STO MEM  | 6456              | 109 | RCL MEM |
| 6358 | 051 | 3        | 6457              | 053 | 5       |
| 6359 | 049 | 1        | 6458              | 050 | 2       |
| 6360 | 109 | RCL MEM  | 6459              | 041 | )       |
| 6361 | 051 | 3        | Print sT+cvvT     |     |         |
| 6362 | 055 | 7        | 6500              | 119 | print   |
| 6363 | 107 | STO MEM  | 6501              | 107 | STO MEM |
| 6364 | 051 | 3        | 6502              | 053 | 5       |
| 6365 | 053 | 5        | 6503              | 052 | 4       |
| 6366 | 064 | Inverse  | 6504              | 040 | (       |
| 6367 | 034 | Set flag | 6505              | 040 | (       |
| 6368 | 050 | 2        | 6506              | 040 | (       |
| 6369 | 034 | Set flag | 6507              | 109 | RCL MEM |
| 6370 | 051 | 3        | 6508              | 049 | 1       |
| 6371 | 086 | V        | 6509              | 056 | 8       |
| 6372 | 096 | LABEL    | 6510              | 043 | +       |
| 6373 | 033 | !        | 6511              | 109 | RCL MEM |
| 6374 | 109 | RCL MEM  | 6512              | 050 | 2       |
| 6375 | 051 | 3        | 6513              | 050 | 2       |
| 6376 | 052 | 4        | 6514              | 043 | +       |
| 6377 | 038 | If zero  | 6515              | 109 | RCL MEM |
| 6378 | 125 | ! !      | 6516              | 050 | 2       |
| 6379 | 107 | STO MEM  | 6517              | 057 | 9       |
| 6380 | 051 | 3        | 6518              | 041 | )       |
| 6381 | 049 | 1        | Print St+Sr       |     |         |
| 6382 | 109 | RCL MEM  | 6559              | 119 | print   |
| 6383 | 051 | 3        | 6560              | 043 | +       |
| 6384 | 055 | 7        | 6561              | 109 | RCL MEM |
| 6385 | 107 | STO MEM  | 6562              | 052 | 4       |
| 6386 | 051 | 3        | 6563              | 057 | 9       |
| 6387 | 053 | 5        | 6564              | 041 | )       |
| 6388 | 064 | Inverse  | 6565              | 107 | STO MEM |
| 6389 | 034 | Set flag | 6566              | 053 | 5       |
| 6390 | 051 | 3        | 6567              | 053 | 5       |
| 6391 | 034 | Set flag | Print St+Sr+Sv    |     |         |
| 6392 | 052 | 4        | 6608              | 119 | print   |
| 6393 | 086 | V        | 6609              | 043 | +       |
| 6394 | 096 | LABEL    | 6610              | 109 | RCL MEM |
| 6395 | 123 | ! !      | 6611              | 053 | 5       |
| 6396 | 096 | LABEL    | 6612              | 049 | 1       |
| 6397 | 125 | ! !      | 6613              | 061 | =       |
| 6398 | 040 | (        | 6614              | 107 | STO MEM |
| 6399 | 109 | RCL MEM  | 6615              | 053 | 5       |
| 6400 | 052 | 4        | 6616              | 054 | 6       |
| 6401 | 057 | 9        | Print St+Sr+Sv+Cv |     |         |
| 6402 | 043 | +        | 6657              | 119 | print   |
| 6403 | 109 | RCL MEM  | 6658              | 042 | x       |
| 6404 | 053 | 5        | 6659              | 109 | RCL MEM |
| 6405 | 049 | 1        | 6660              | 048 | 0       |

```

6661 056 8
6662 061 =
Print [St+Sr+Sv+Sv]T
6703 119 print
6704 107 STO MEM
6705 053 5
6706 055 7
6707 047 /
6708 054 6
6709 046 .
6710 048 0
6711 050 2
6712 050 2
6713 049 1
6714 052 4
6715 049 1
6716 053 5
6717 101 EE
6718 049 1
6719 054 6
6720 061 =
6721 119 print
[st+sr+sv+cv]T printed
6762 040 (
6763 109 RCL MEM
6764 053 5
6765 053 5
6766 042 x
6767 109 RCL MEM
6768 048 0
6769 056 8
6770 041 )
Print [St+Sr+Sv]T
6811 119 print
6812 047 /
6813 054 6
6814 046 .
6815 048 0
6816 050 2
6817 050 2
6818 049 1
6819 052 4
6820 049 1
6821 053 5
6822 101 EE
6823 049 1
6824 054 6
6825 061 =
Print [st+sr+sv]T
6866 119 print
6867 109 RCL MEM
6868 054 6
6869 049 1

```

```

Print cumulative -G/T
6910 119 print
6911 042 x
6912 109 RCL MEM
6913 048 0
6914 056 8
6915 061 =
Print -G
6956 119 print
6957 109 RCL MEM
6958 054 6
6959 050 2
Print cumulative H/T
7000 119 print
7001 042 x
7002 109 RCL MEM
7003 048 0
7004 056 8
7005 061 =
Print cumulative H
7046 119 print
7047 048 0
7048 107 STO MEM
7049 053 5
7050 054 6
7051 107 STO MEM
7052 053 5
7053 053 5
7054 107 STO MEM
7055 053 5
7056 052 4
7057 107 STO MEM
7058 053 5
7059 051 3
7060 107 STO MEM
7061 053 5
7062 050 2
7063 107 STO MEM
7064 053 5
7065 049 1
7066 107 STO MEM
7067 053 5
7068 048 0
7069 107 STO MEM
7070 052 4
7071 057 9
7072 107 STO MEM
7073 049 1
7074 056 8
7075 096 LABEL
7076 115 Sine
7077 044 Reset
7078 002 HALT

```
